# Supplementary material
Source: MDPI journal article supplement (https://www.mdpi.com/1424-2818/14/4/276)
Supplement: s1 [file s1 › diversity-1665524-supplementary.pdf]

**Supplementary Materials Figure S1:** Supplementary material. NJ compressed tree based on worldwide COI sequences of *Arrenurus* (In total 1111 sequences, representing 148 putative species). \* New species and \*\* New records. Shared species between Mexico and other countries are highlight

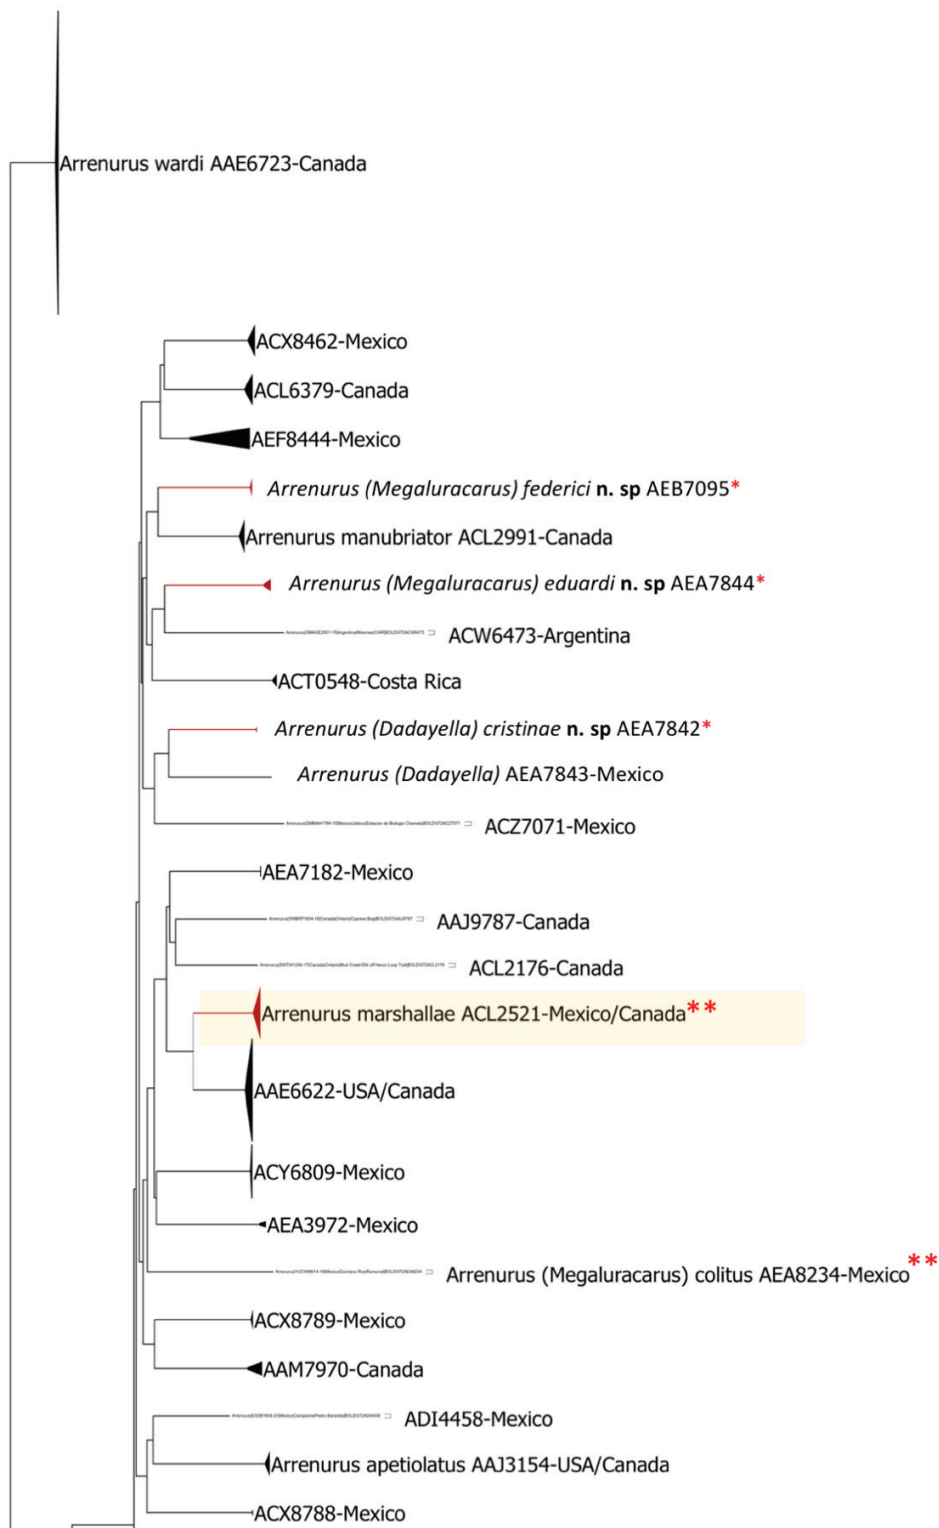

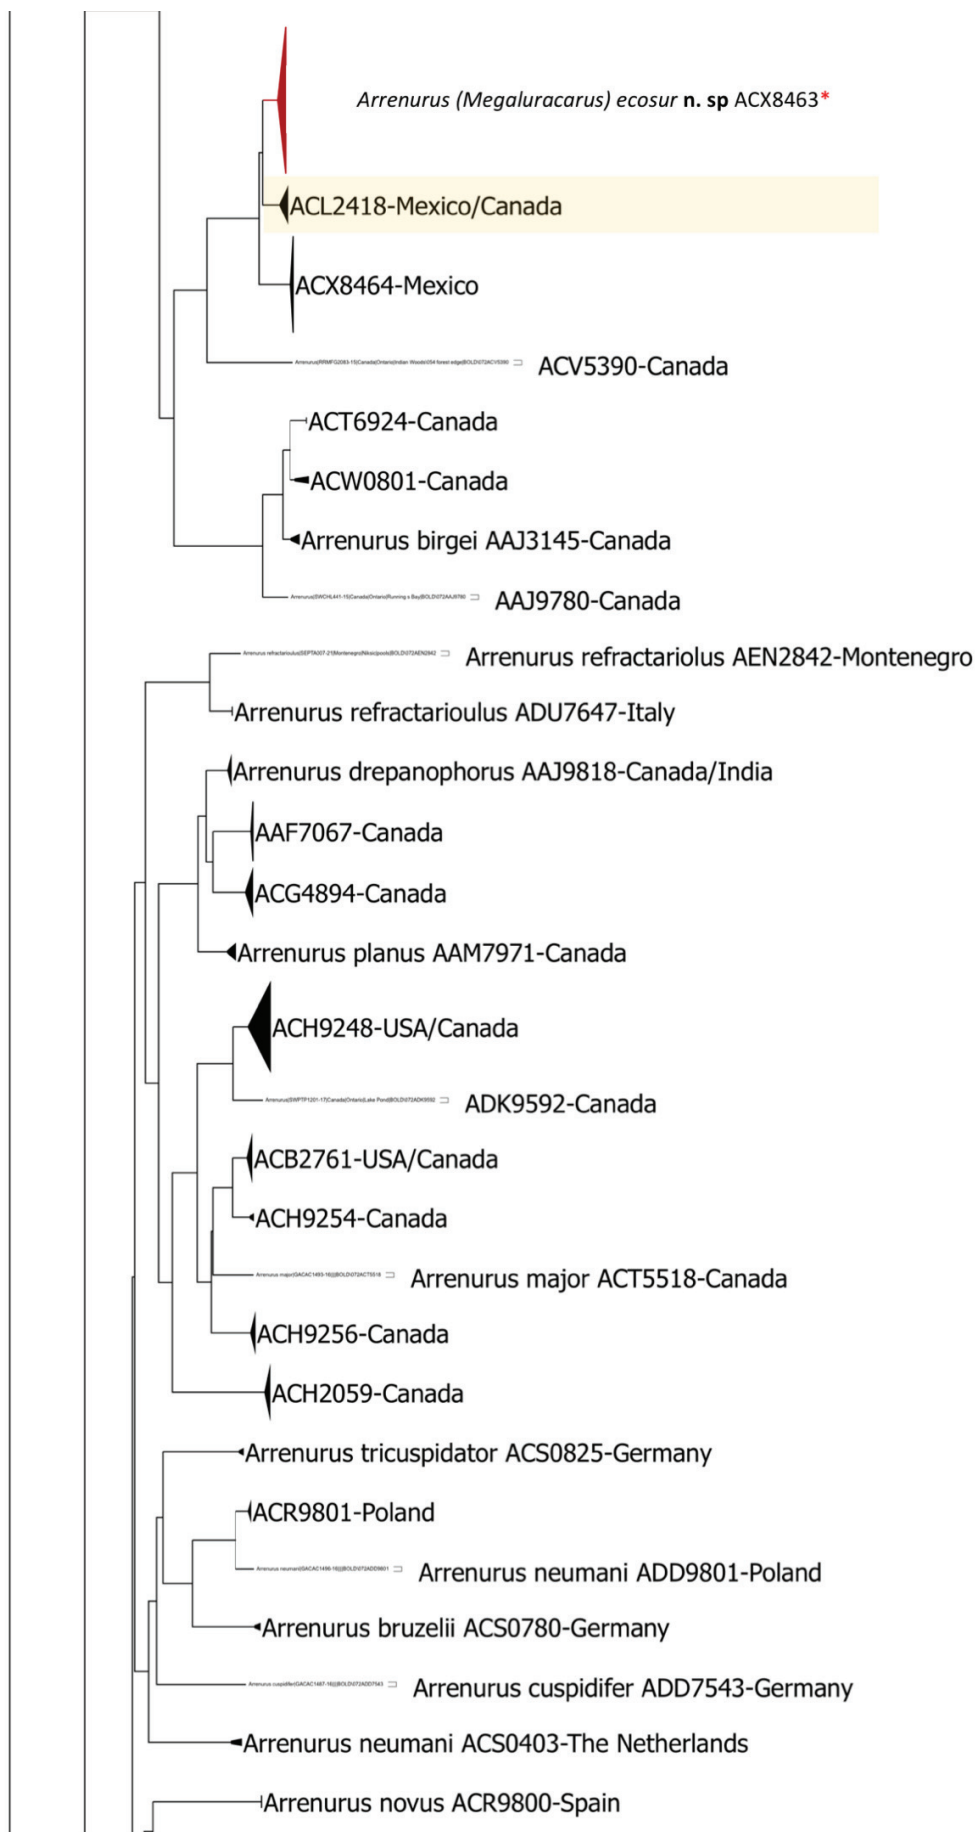

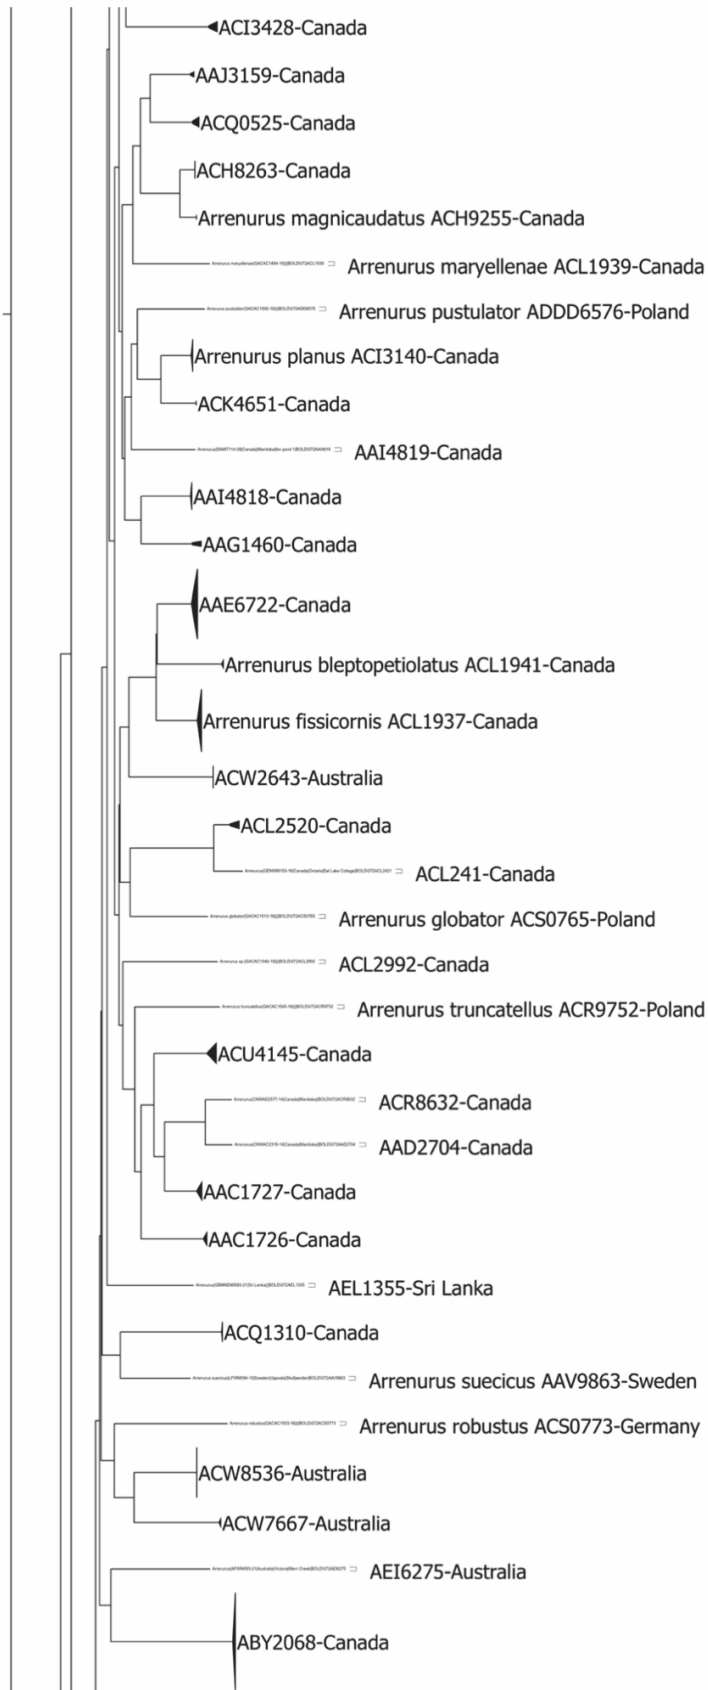

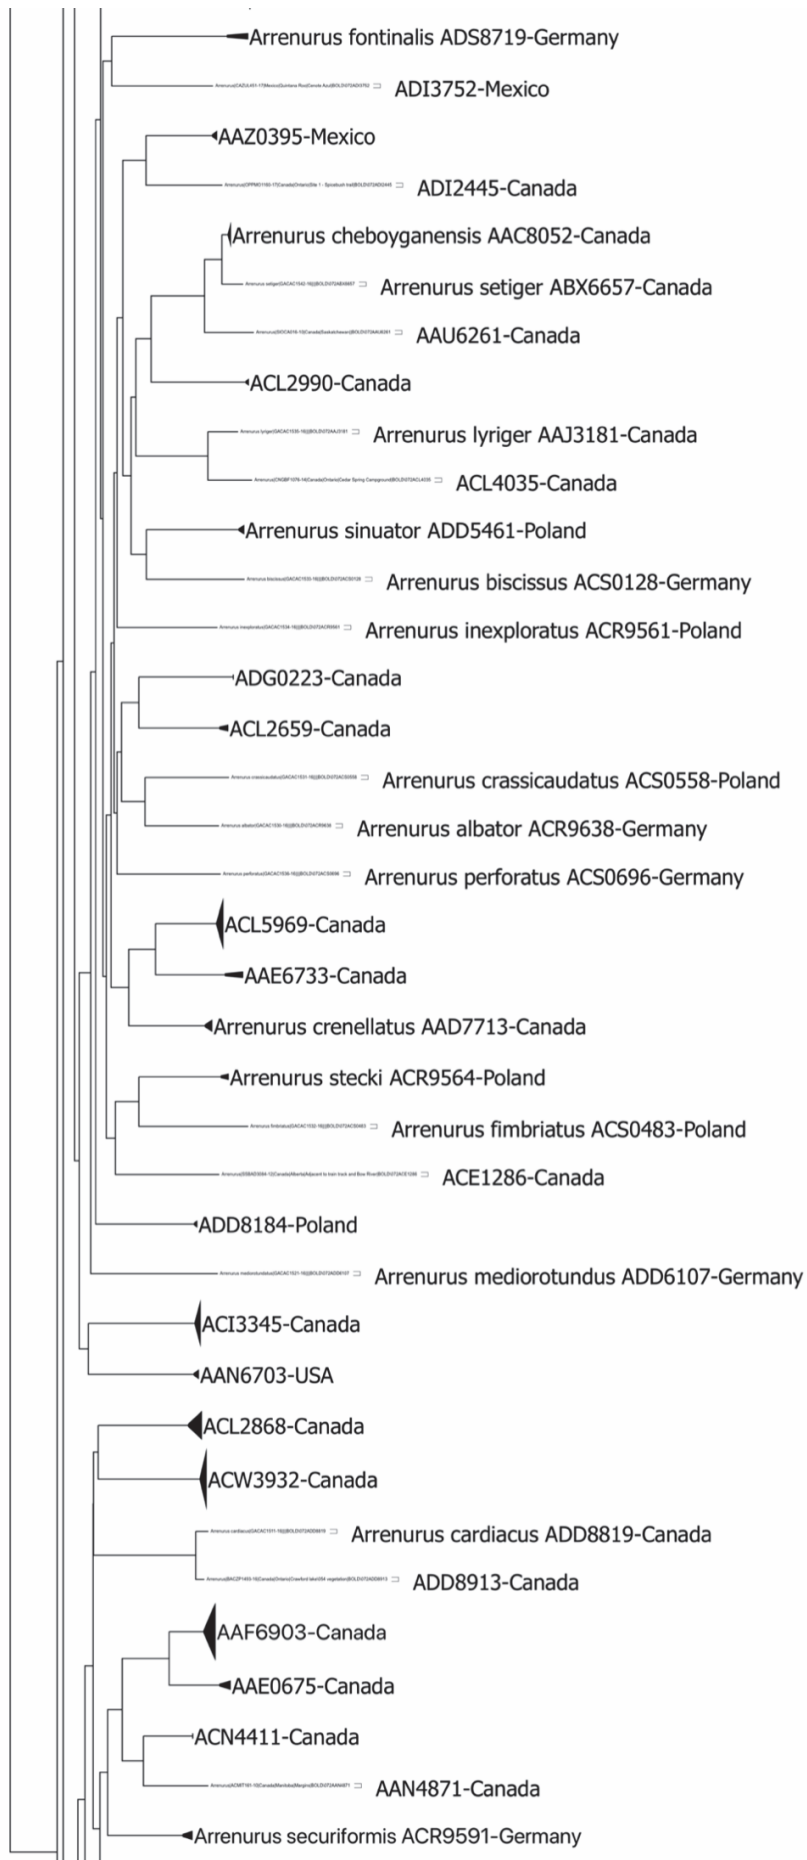

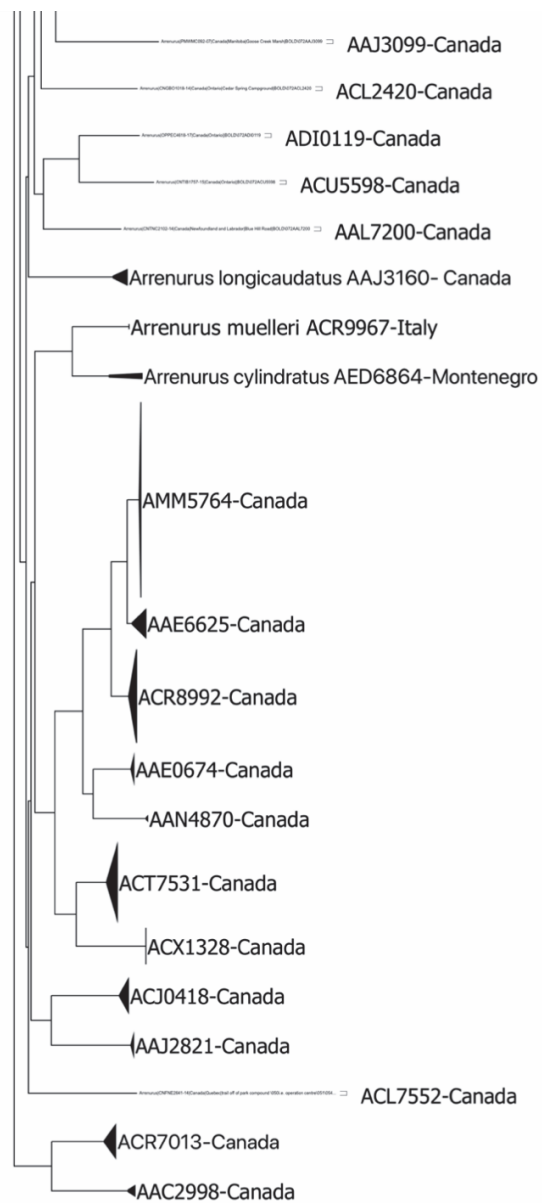

0.04
